# Supplementary material
Source: HighWire-hosted journal article supplement (https://bmjopenquality.bmj.com/highwire/filestream/147461/field_highwire_adjunct_files/0/bmjqs-2012-001748supp_appendix.pdf)
Supplement: bmjqs-2012-001748supp_appendix.pdf [file bmjqs-2012-001748supp_appendix.pdf]

| Contributing Factors |                                                                  | Case number<br>Clavien Dindo grade |               |               |             |             |               |             |             |               |                |               |                |                |              |              |                |                 |              | % Tirggered<br>contributing<br>factors | % Activation of<br>categories<br>across<br>MMC |
|----------------------|------------------------------------------------------------------|------------------------------------|---------------|---------------|-------------|-------------|---------------|-------------|-------------|---------------|----------------|---------------|----------------|----------------|--------------|--------------|----------------|-----------------|--------------|----------------------------------------|------------------------------------------------|
| CATEGORIES           | Subcategory description                                          | CASE 1<br>V                        | CASE 2<br>IIb | CASE 3<br>IVa | CASE 4<br>V | CASE 5<br>V | CASE 6<br>IVa | CASE 7<br>V | CASE 8<br>V | CASE 9<br>IIb | CASE 10<br>IIb | CAS 11<br>IIb | CASE 12<br>IIb | CASE 13<br>IIb | CASE 14<br>V | CASE 15<br>V | CASE 16<br>IIb | CASE 17<br>IIIB | Case 18<br>V |                                        |                                                |
| PATIENT              | Medical history                                                  |                                    |               |               |             |             |               |             |             |               |                |               |                |                |              |              |                |                 |              | 38.8                                   | 11 (61.1%)                                     |
|                      | Case complexity                                                  |                                    |               |               |             |             |               |             |             |               |                |               |                |                |              |              |                |                 |              | 38.8                                   |                                                |
|                      | Barriers to communication                                        |                                    |               |               |             |             |               |             |             |               |                |               |                |                |              |              |                |                 |              | 5.5                                    |                                                |
|                      | Social and Family Factors                                        |                                    |               |               |             |             |               |             |             |               |                |               |                |                |              |              |                |                 |              | 11.1                                   |                                                |
|                      | Conflicting relationships with<br>healthcare workers and/or care |                                    |               |               |             |             |               |             |             |               |                |               |                |                |              |              |                |                 |              | 5.5                                    |                                                |
| Tasks                | Therapeutic strategy                                             |                                    |               |               |             |             |               |             |             |               |                |               |                |                |              |              |                |                 |              | 22.2                                   | 14 (77.7%)                                     |
|                      | Tasks                                                            |                                    |               |               |             |             |               |             |             |               |                |               |                |                |              |              |                |                 |              | 11.1                                   |                                                |
|                      | Para clinical tests                                              |                                    |               |               |             |             |               |             |             |               |                |               |                |                |              |              |                |                 |              | 16.6                                   |                                                |
|                      | Protocols                                                        |                                    |               |               |             |             |               |             |             |               |                |               |                |                |              |              |                |                 |              | 61.1                                   |                                                |
| Healthcare staff     | Knowledge<br>and technical skills                                |                                    |               |               |             |             |               |             |             |               |                |               |                |                |              |              |                |                 |              | 5.5                                    | 12 (66.6%)                                     |
|                      | Soft skills                                                      |                                    |               |               |             |             |               |             |             |               |                |               |                |                |              |              |                |                 |              | 16.6                                   |                                                |
|                      | Physical and mental state                                        |                                    |               |               |             |             |               |             |             |               |                |               |                |                |              |              |                |                 |              | 55.5                                   |                                                |

|                  |                                                         |                                                                                                                       |  |  |  |  |  |  |  |  |  |  |  |  |  |  |  |  |  |  |  |      |            |
|------------------|---------------------------------------------------------|-----------------------------------------------------------------------------------------------------------------------|--|--|--|--|--|--|--|--|--|--|--|--|--|--|--|--|--|--|--|------|------------|
| Team (s)         | Team structure/ organization                            | - Staffing<br>- Competence<br>- Functioning<br>- Distribution of tasks [12]                                           |  |  |  |  |  |  |  |  |  |  |  |  |  |  |  |  |  |  |  | 44.4 | 17 (94,4%) |
|                  | Professional communication within the team              | - Oral communication?<br>- Written communication?<br>- Critical information [13]                                      |  |  |  |  |  |  |  |  |  |  |  |  |  |  |  |  |  |  |  | 16.6 |            |
|                  | Professional communication with other teams/departments | - Oral communication?<br>- Written communication?<br>- Critical information [14]                                      |  |  |  |  |  |  |  |  |  |  |  |  |  |  |  |  |  |  |  | 44.4 |            |
|                  | Communication with the patient                          | - Nature of care<br>-Risks and prognosis<br>- Aggravation<br>- Consent [15]                                           |  |  |  |  |  |  |  |  |  |  |  |  |  |  |  |  |  |  |  | 0    |            |
|                  | Documentation of the patient's record                   | - Availability of data<br>- Quality of the data<br>- Data management [16]                                             |  |  |  |  |  |  |  |  |  |  |  |  |  |  |  |  |  |  |  | 5.5  |            |
|                  | Support and supervision                                 | Technical support<br>- Moral support<br>- Supervision [17]                                                            |  |  |  |  |  |  |  |  |  |  |  |  |  |  |  |  |  |  |  | 5.5  |            |
| Work Environment | Physical environment                                    | - Noise<br>- Temperature<br>- Brightness<br>- Ergonomics                                                              |  |  |  |  |  |  |  |  |  |  |  |  |  |  |  |  |  |  |  | 0    | 9 (50%)    |
|                  | Material and equipment                                  | -Availability<br>- Adequacy<br>- Use [18]                                                                             |  |  |  |  |  |  |  |  |  |  |  |  |  |  |  |  |  |  |  | 44.4 |            |
|                  | Medical Information system                              | -Availability<br>- Adequacy<br>- Use [19]                                                                             |  |  |  |  |  |  |  |  |  |  |  |  |  |  |  |  |  |  |  | 11.1 |            |
|                  | Workload                                                | - Clinical<br>- Non-clinical [20]                                                                                     |  |  |  |  |  |  |  |  |  |  |  |  |  |  |  |  |  |  |  | 11.1 |            |
|                  | Delays in care?                                         | - Advance and rush<br>- Delays<br>- Imposed delay [21]                                                                |  |  |  |  |  |  |  |  |  |  |  |  |  |  |  |  |  |  |  | 5.5  |            |
|                  | Administrative burdens                                  | - Application of procedures?<br>- Review of administrative processes<br>- Hierarchical structure<br>- Delegation [22] |  |  |  |  |  |  |  |  |  |  |  |  |  |  |  |  |  |  |  | 0    |            |
|                  | Personnel management                                    | - Assignment of positions<br>- Job description [23]                                                                   |  |  |  |  |  |  |  |  |  |  |  |  |  |  |  |  |  |  |  | 5.5  |            |

|            |                                          |                                                                                                               |  |  |  |  |  |  |  |  |  |  |  |  |  |  |  |  |  |      |         |
|------------|------------------------------------------|---------------------------------------------------------------------------------------------------------------|--|--|--|--|--|--|--|--|--|--|--|--|--|--|--|--|--|------|---------|
| MANAGEMENT | Training and integration of personnel    | - Training of a newcomer<br>- Ongoing training<br>- Integration [24]                                          |  |  |  |  |  |  |  |  |  |  |  |  |  |  |  |  |  | 0    | 9 (50%) |
|            | Outsourcing management                   | - Availability of services<br>- Quality of services<br>- Service management [25]                              |  |  |  |  |  |  |  |  |  |  |  |  |  |  |  |  |  | 0%   |         |
|            | Purchasing management                    | - Product availability<br>- Product quality<br>- Shortage management [26]                                     |  |  |  |  |  |  |  |  |  |  |  |  |  |  |  |  |  | 11.1 |         |
|            | Quality and safety management and safety | - Arbitration against safety<br>- Previously reported failure<br>- Failure previously targeted by action [27] |  |  |  |  |  |  |  |  |  |  |  |  |  |  |  |  |  | 27.7 |         |
|            | Out-of-hospital context                  | - Institutional context<br>- Socio-economic context<br>- Regional, national level..                           |  |  |  |  |  |  |  |  |  |  |  |  |  |  |  |  |  | 16.6 |         |
